# Supplementary material for: An Alternative Method for Quantitative Mass Spectrometry Imaging (q-MSI) of Dopamine Utilizing Fragments of Animal Tissue
Source: PubMed Central journal article supplement — Mass Spectrom (Tokyo). 2023 Jul 25;12(1):A0128. doi: 10.5702/massspectrometry.A0128 (PMC10394126; doi:10.5702/massspectrometry.a0128), 2023-07-25
Supplement: Supplementary_Information.pdf [file Supplementary_Information.pdf]

Supporting Fig. 1

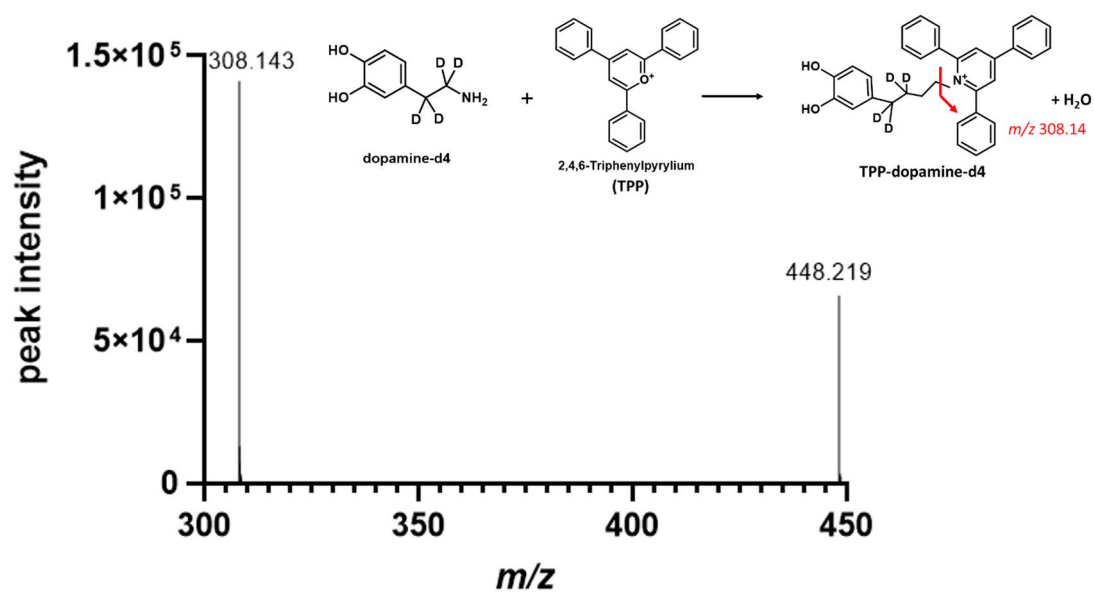

TPP-DA-d4 mass spectrum. The molecular structure of TPP-DA-d4 is formed by the reaction of TPP and DA-d4.  $m/z$  308.14 derived from TPP reagent is detected in the product ion spectrum of TPP-DA-d4.

Supporting Fig.2

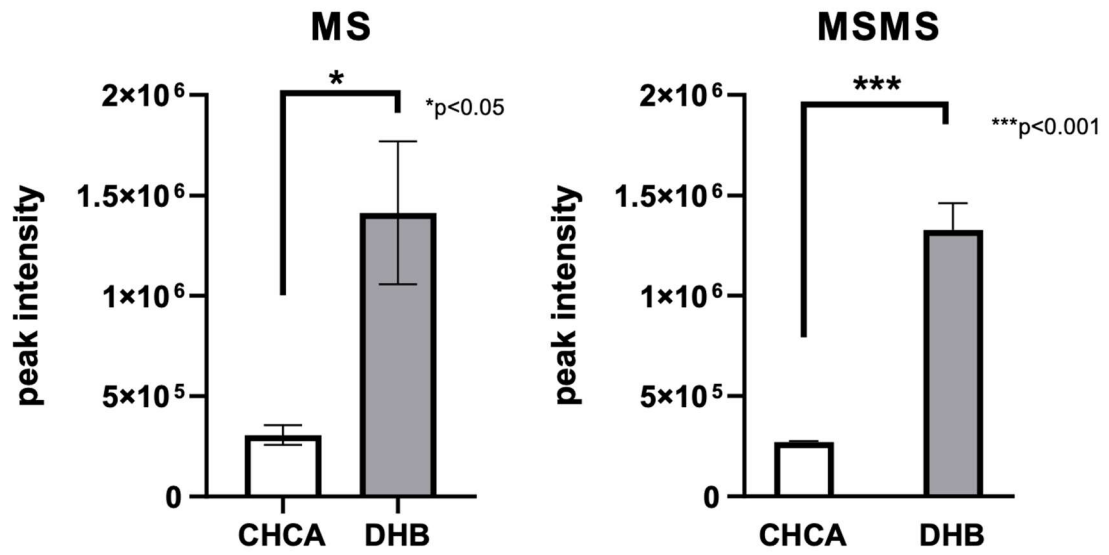

Optimization of matrix conditions. The peak intensity of TPP-DA was significantly increased when DHB was used compared to when CHCA was used as the matrix. A) MS measurement B) MSMS measurement

### Supporting Fig. 3

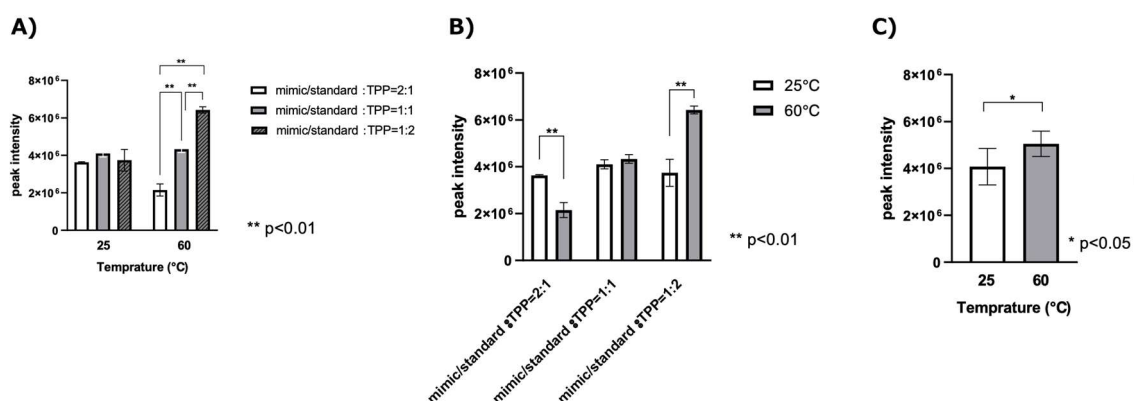

Improvement of DA detection intensity by examining derivatization conditions A) and B) show the reaction of standard solution/mimic sample mixture and TPP solution in a tube, followed by the addition of matrix. C) shows the standard solution/mimic sample mixture was spotted on ITO glass, and the derivatization reagent and matrix were supplied by spraying in the same way as in the TPP-DA determination described in the main text. A) the intensity of TPP-DA detection at different TPP supply rates and derivatization reaction temperatures. At 25°C, the intensity of TPP-DA detection remained unchanged regardless of the TPP supply rate, but at 60°C, the intensity of TPP-DA detection increased with increasing TPP supply rate. B) TPP-DA detection intensity increased under the heated condition when TPP was supplied sufficiently (mimic/standard:TPP=1:1 or higher). C) Compares the derivatization reaction at 25°C and 60°C under the conditions of TPP-DA quantification described in the main text, and shows that the TPP-DA detection intensity significantly increased under the heated condition.

Supporting Fig. 4

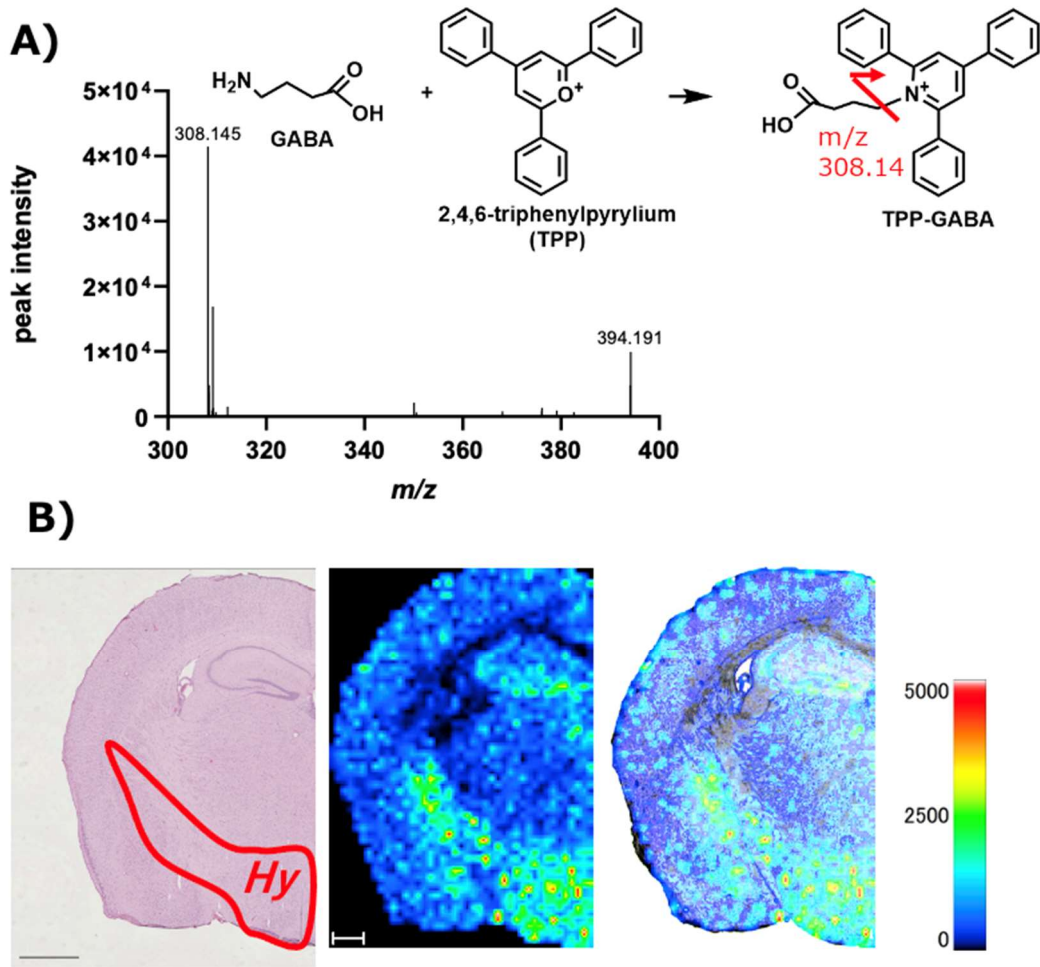

Mass spectrum of  $\gamma$ -aminobutyric acid (GABA) and MALDI-MSI results. A) Molecular structure of TPP-GABA formed by the reaction of TPP and GABA.  $m/z$  308.14 derived from TPP reagent is detected in the product ion spectrum of TPP-GABA. Distribution of TPP-DA in coronal sections of mouse brain tissue. B) TPP-DA is localized in the hypothalamus (Hy) when compared to hematoxylin and eosin staining (HE staining) of post-measured sections. Scale bar is  $500\mu\text{m}$ .

Supporting Fig 5

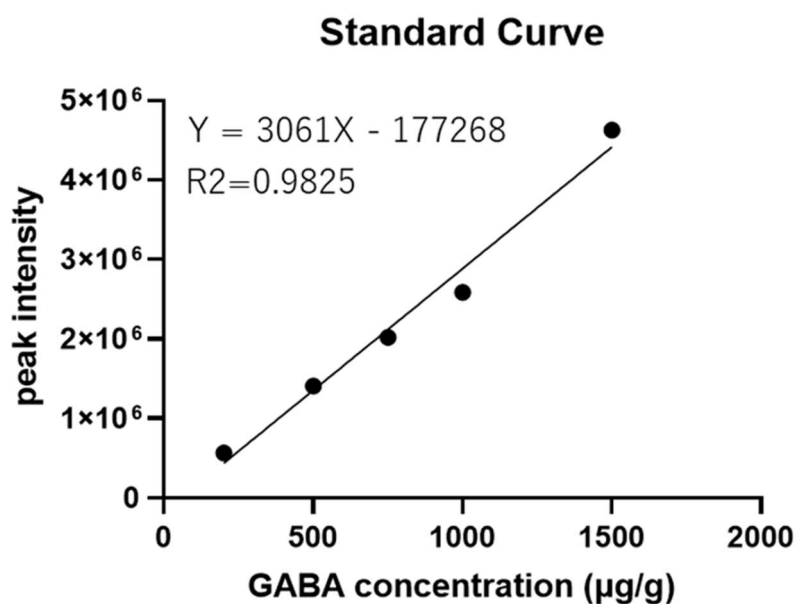

| GABA conc.<br>( $\mu\text{g/g}$ ) | average peak<br>intensity (n=3) | quantitative value<br>( $\mu\text{g/g}$ ) | accuracy<br>(%) | RSD<br>(%) |
|-----------------------------------|---------------------------------|-------------------------------------------|-----------------|------------|
| 1500                              | 4627386                         | 1569.6                                    | -4.6            | 16.7       |
| 1000                              | 2586142                         | 902.8                                     | 9.7             | 12.7       |
| 750                               | 2018752                         | 717.4                                     | 4.3             | 6.5        |
| 500                               | 1407784                         | 517.8                                     | -3.6            | 7.0        |
| 200                               | 565192                          | 242.6                                     | -21.3           | 7.4        |

Quantitative determination of TPP-GABA in mouse brain thalamus. The coefficient of determination of linearity ( $R^2$ ) was set to be greater than 0.98, accuracy within  $\pm 30\%$ , and RSD within  $\pm 20\%$  in MALDI-MSI.
